# Supplementary material for: Toxic dust emission from drought-exposed lake beds – a new air pollution threat from dried lakes
Source: Copernicus journal article supplement (doi:10.5194/acp-25-12657-2025), 2025-10-10
Supplement: Supplementary file 1 [file acp-25-12657-2025-supplement.pdf]

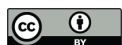

*Supplement of*

**Toxic dust emission from drought-exposed lake beds – a new air pollution threat from dried lakes**

**Qianqian Gao et al.**

*Correspondence to:* Hongliang Zhang (zhanghl@fudan.edu.cn) and Xiaofei Wang (xiaofeiwang@fudan.edu.cn)

The copyright of individual parts of the supplement might differ from the article licence.

## **S1. PAH Standards**

A PAH standard mixture, referred to as PAH-Mix 16, encompasses 16 target analytes: phenanthrene (PHE), anthracene (ANA), fluoranthene (FLA), pyrene (PYR), benzo[a]anthracene (BaA), chrysene (CHR), benzo[b]fluoranthene (BbF), benzo[k]fluoranthene (BkF), benzo[a]pyrene (BaP), dibenzo[a,h]anthracene (DBA), indeno[1,2,3-cd]pyrene (IDP), and benzo[g,h,i]perylene (BPE) dissolved in dichloromethane (1000 µg/mL). Additionally, five internal standards including D8-naphthalene, D10-acenaphthene, D10-phenanthrene, D12-chrysene, and D12-perylene in dichloromethane (1000 µg/mL) were provided by TanMo Quality Testing Technology Co., Ltd. All standards were verified with a purity of over 98%. Working solutions were prepared at concentrations of 1, 2, 5, 10, 20, 25, 50, 100, 200 and 500 ng/mL in isooctane and stored at -10°C in a refrigerator. Each calibration level contained relevant internal standards at 100 ng/mL.

## **S2. Temperature programmed method of PAHs**

The GC-MS oven temperature was programmed as follows: starting at an initial temperature of 40°C, held for 4 min, then increased to 160°C at a rate of 10°C/min and held for 1 min, followed by a ramp to 280°C at 10°C/min, where it was held for 4 min. Finally, the temperature was raised to 300°C at 10°C /min and maintained for 10 min. The total analysis duration was 45 min. Sample injections were carried out in splitless mode, using helium as the carrier gas at a constant flow rate of 1 mL/min. Five internal standards were spiked into each sample before analysis. The retention times for the PAHs were established after identifying each compound in scan mode.

**S3. All statistics equations related to the model validation are shown below:**

$$\mathbf{MB} = \frac{1}{N} \sum_{i=1}^N (\mathbf{C}_m - \mathbf{C}_o)$$

$$\mathbf{GE} = \frac{1}{N} \sum_{i=1}^N |\mathbf{C}_m - \mathbf{C}_o|$$

$$\mathbf{RMSE} = \sqrt{\frac{\sum_{i=1}^N (\mathbf{C}_m - \mathbf{C}_o)^2}{N}}$$

$$\mathbf{MFB} = \frac{1}{N} \sum_{i=1}^N \left( \frac{\mathbf{C}_m - \mathbf{C}_o}{\left( \frac{\mathbf{C}_o + \mathbf{C}_m}{2} \right)} \right)$$

$$\mathbf{MFE} = \frac{1}{N} \sum_{i=1}^N \left( \frac{|\mathbf{C}_m - \mathbf{C}_o|}{\left( \frac{\mathbf{C}_o + \mathbf{C}_m}{2} \right)} \right)$$

$$\mathbf{MNB} = \frac{1}{N} \sum_{i=1}^N \left( \frac{\mathbf{C}_m - \mathbf{C}_o}{\mathbf{C}_o} \right)$$

$$\mathbf{MNE} = \frac{1}{N} \sum_{i=1}^N \left| \frac{\mathbf{C}_m - \mathbf{C}_o}{\mathbf{C}_o} \right|$$

In these equations  $\mathbf{C}_m$  represents the model results,  $\mathbf{C}_o$  represents the observations, and  $N$  is the number of data points,  $i$  represents a data point.

#### **S4. Determination of exposure frequency in health risk assessment of Poyang Lake and Dongting Lake**

To establish the parameter settings for health risk assessment formulas, this study referenced EPA reports and pertinent literature on Poyang Lake and Dongting Lake. For residents, the outdoor exposure time was defined as 8 hours per day (Ren et al., 2021; Agency, 2009). Fig. S3, Fig. S4, and Table S5 illustrate that during drought periods, the water level at Xingzi Station in Poyang Lake was defined at 7 m below, corresponding to a lake area of 600 km<sup>2</sup> (~4% of the lake's area) (Fig. S3a). Based on the 15-year average from 2000 to 2014, the exposure frequency for Poyang Lake was calculated as 80 days per year. For Dongting Lake, drought conditions were defined when the lake area dropped below 700 km<sup>2</sup> (Fig. S3b), and timing data (Fig. S4) established an exposure frequency of 140 days per year. Additionally, the exposure duration for residents was set at 30 years, consistent with government environmental assessment guidelines (Bureau, 2009). All parameters are systematically presented in Table S6.

**Table S1.** Mass (g) of particles collected in dust aerosols for PM<sub>2.5</sub> and PM<sub>10</sub> across three replicates (PM<sub>2.5</sub>-1 to PM<sub>2.5</sub>-3 and PM<sub>10</sub>-1 to PM<sub>10</sub>-3). Sampling sites include dry (D), transitional (T), and submerged (S) regions of Poyang Lake (PY) and Dongting Lake (DT).

| EXP                  | PY-D1  | PY-T1  | PY-S1  | PY-D2  | PY-T2  | PY-S2  | DT-D1  | DT-T1  | DT-S1  |
|----------------------|--------|--------|--------|--------|--------|--------|--------|--------|--------|
| PM <sub>2.5</sub> -1 | 0.0131 | 0.011  | 0.0134 | 0.0143 | 0.0118 | 0.0111 | 0.0137 | 0.0112 | 0.0123 |
| PM <sub>2.5</sub> -2 | 0.0155 | 0.0129 | 0.0151 | 0.0127 | 0.0118 | 0.0139 | 0.0131 | 0.0112 | 0.0149 |
| PM <sub>2.5</sub> -3 | 0.0163 | 0.0124 | 0.0134 | 0.0164 | 0.0145 | 0.0161 | 0.0137 | 0.0123 | 0.0129 |
| PM <sub>10</sub> -1  | 0.0226 | 0.0222 | 0.0214 | 0.0213 | 0.0246 | 0.0253 | 0.0229 | 0.0223 | 0.0226 |
| PM <sub>10</sub> -2  | 0.0288 | 0.0212 | 0.023  | 0.0223 | 0.0241 | 0.022  | 0.0225 | 0.0298 | 0.0215 |
| PM <sub>10</sub> -3  | 0.0227 | 0.0217 | 0.0223 | 0.022  | 0.0232 | 0.0276 | 0.0236 | 0.0232 | 0.0243 |

**Table S2.** Scenarios setting.

|                | description                               |
|----------------|-------------------------------------------|
| CASE_unexposed | 2022 Meteorology with ordinary lake       |
| CASE_exposed   | 2022 Meteorology with the exposed lakebed |

**Table S3.** The sixteen priority PAHs identified by the U.S. EPA, along with their abbreviations and toxic equivalency factors (TEFs) as derived from previous studies (Delistraty, 1997; Nisbet and Lagoy, 1992).

| PAHs name               | abbreviation | TEF   | Quantitative ion |
|-------------------------|--------------|-------|------------------|
| Naphthalene             | NAP          | 0.001 | 128              |
| Acenaphthylene          | ANY          | 0.001 | 152              |
| Acenaphthene            | ANA          | 0.001 | 154              |
| Fluorene                | FLU          | 0.001 | 166              |
| Phenanthrene            | PHE          | 0.001 | 178              |
| Anthracene              | ANT          | 0.01  | 178              |
| Fluoranthene            | FLT          | 0.001 | 202              |
| Pyrene                  | PYR          | 0.001 | 202              |
| Benz[a]anthracene       | BaA          | 0.1   | 228              |
| Chrysene                | CHR          | 0.01  | 228              |
| Benzo(b)fluoranthene    | BbF          | 0.1   | 252              |
| Benzo(k)fluoranthene    | BkF          | 0.1   | 252              |
| Benzo(a)pyrene          | BaP          | 1     | 252              |
| Indeno[1,2,3-cd] pyrene | IPY          | 0.1   | 278              |
| Dibenz[a,h]anthracene   | DBA          | 1     | 276              |
| Benzo[ghi]perylene      | BPE          | 0.01  | 276              |

**Table S4.** Twelve selected toxic metals, along with TEFs, were estimated obtained from the U.S. EPA website (EPA).

| Heavy metals | TEF                   |
|--------------|-----------------------|
| Fe           | /                     |
| Mg           | /                     |
| Mn           | /                     |
| Ba           | /                     |
| Ti           | /                     |
| V            | /                     |
| Cu           | /                     |
| Zn           | /                     |
| Cr           | 1                     |
| Ni           | $3.1 \times 10^{-3}$  |
| As           | $5.12 \times 10^{-2}$ |
| Pb           | $1.43 \times 10^{-4}$ |

Note: Only metals with available toxicity equivalency factors (TEFs) from the U.S. EPA are listed with values; “/” indicates that no TEF value is currently available.

**Table S5.** The drought duration in recent years according to water level records from Xingzi station of Poyang Lake (Qi et al., 2019).

| Year              | Drought<br>duration/d |         |       |       |       |        |
|-------------------|-----------------------|---------|-------|-------|-------|--------|
|                   | <5.5 m                | 5.5~6 m | 6~7 m | 7~8 m | 8~9 m | 9~10 m |
| 2003              | 0                     | 1       | 31    | 54    | 83    | 118    |
| 2004              | 31                    | 61      | 83    | 118   | 175   | 190    |
| 2005              | 0                     | 0       | 34    | 71    | 95    | 152    |
| 2006              | 0                     | 6       | 83    | 139   | 184   | 229    |
| 2007              | 20                    | 61      | 100   | 145   | 195   | 222    |
| 2008              | 9                     | 42      | 86    | 109   | 127   | 159    |
| 2009              | 0                     | 55      | 123   | 141   | 167   | 188    |
| 2010              | 0                     | 13      | 57    | 88    | 122   | 142    |
| 2011              | 0                     | 0       | 70    | 181   | 239   | 264    |
| 2012              | 0                     | 9       | 19    | 59    | 104   | 134    |
| 2013              | 3                     | 16      | 69    | 122   | 148   | 188    |
| 2014              | 4                     | 52      | 69    | 90    | 144   | 169    |
| 1951-1999 average | 3.4                   | 12.7    | 42.7  | 73.5  | 100   | 126.4  |
| 2000-2014 average | 4.5                   | 18.9    | 56.6  | 97.8  | 136   | 169.5  |



66 **Table S6.** Summary of key parameter values used in assessing health risks from inhalation exposure to  
67 heavy metals in PM<sub>10</sub>.

| Parameter | Definition              | Unit                                | Value                                                                                                                                                                                                                                                                         | Reference                                                              |
|-----------|-------------------------|-------------------------------------|-------------------------------------------------------------------------------------------------------------------------------------------------------------------------------------------------------------------------------------------------------------------------------|------------------------------------------------------------------------|
| ET        | Exposure time           | hours×day <sup>-1</sup>             |                                                                                                                                                                                                                                                                               | USEPA,<br>8 2009(Agency),<br>2009)                                     |
| EF        | Exposure frequency      | days×year <sup>-1</sup>             | 140 for Dongting Lake; 80 for Poyang Lake                                                                                                                                                                                                                                     | These studies (Qi et al., 2019; Huang et al., 2012)                    |
| ED        | Exposure duration       | year                                |                                                                                                                                                                                                                                                                               | USEPA,<br>30 2009(Agency),<br>2009)                                    |
| AT        | Averaging time          | hour                                | ED×365×24 (for non-carcinogenic risk)<br>70×365×24 (for carcinogenic risk)                                                                                                                                                                                                    | USEPA,<br>2009(Agency),<br>2009)                                       |
| RfC       | Reference concentration | μg×m <sup>-3</sup>                  | Cr (VI)*: 1.0×10 <sup>-7</sup><br>Mn: 5.0×10 <sup>-8</sup><br>Co: 6.0×10 <sup>-9</sup><br>Ni: 1.4×10 <sup>-8</sup><br>As: 1.5×10 <sup>-8</sup><br>Cd: 1.0×10 <sup>-8</sup><br>Ba: 5.0×10 <sup>-7</sup><br>V: 1.0×10 <sup>-7</sup><br>BaP <sub>eq</sub> : 2.0×10 <sup>-3</sup> | USEPA,<br>2020(Agency),<br>2020)                                       |
| IUR       | Inhalation unit risk    | (μg×m <sup>-3</sup> ) <sup>-1</sup> | Cr (VI)*: 8.4×10 <sup>-2</sup><br>Co: 9.0×10 <sup>-3</sup><br>Mn: 0<br>Ba: 0<br>V: 0<br>Ni: 2.4×10 <sup>-4</sup><br>As: 4.3×10 <sup>-3</sup><br>Cd: 1.8×10 <sup>-3</sup><br>Pb: 8.0×10 <sup>-5</sup><br>BaP <sub>eq</sub> : 8.0×10 <sup>-2</sup>                              | USEPA,<br>2020(Agency),<br>2020)<br><br>WHO<br>(Organization,<br>2000) |

|    |                           |                                  |                                                                            |                            |
|----|---------------------------|----------------------------------|----------------------------------------------------------------------------|----------------------------|
| AV | Acute dose-response Value | $\mu\text{g}\times\text{m}^{-3}$ | Cr (III)**: 0.48<br>Mn: 0.17<br><br>Ni: 0.2<br>As: 0.2<br>V: 30<br>Cu: 100 | OEHHA<br>(Monserrat, 2016) |
|----|---------------------------|----------------------------------|----------------------------------------------------------------------------|----------------------------|

68 Note:  
69 — Only the total Cr content was determined in this study. Given that the ratio of Cr (VI) to Cr (III) in  
70 the atmosphere has been reported as approximately 1:6 (Wu et al., 2020; Ramírez et al., 2020; Liu et  
71 al., 2018; Huang et al., 2018), the Cr (VI) content was estimated to be one-seventh of the total Cr content  
72 for the purpose of assessing chronic non-carcinogenic and carcinogenic risks. And Cr (III) content was  
73 estimated to be six-seventh of the total Cr content for assessing short-term non-carcinogenic risks.  
74

**Table S7.** Meteorology performance in 2022 October (OBS is mean observation; PRE is mean prediction; MB is mean bias; GE is gross error; RMSE is root mean square error). The benchmarks are suggested by Emery et al. (2001)). The values that do not meet the criteria are denoted in bold. The related equations are shown in Text S3.

|                              |             | CASE_unexposed<br>(12km) | CASE_exposed<br>(12km) | Criteria       |
|------------------------------|-------------|--------------------------|------------------------|----------------|
| <b>T2 (K)</b>                | <b>OBS</b>  | 290.2                    | 290.2                  |                |
|                              | <b>PRE</b>  | 290.3                    | 290.3                  |                |
|                              | <b>MB</b>   | 0.05                     | 0.04                   | $\leq \pm 0.5$ |
|                              | <b>GE</b>   | <b>2.11</b>              | <b>2.11</b>            | $\leq 2.0$     |
|                              | <b>RMSE</b> | 2.82                     | 2.82                   |                |
| <b>WS (m s<sup>-1</sup>)</b> | <b>OBS</b>  | 3.21                     | 3.21                   |                |
|                              | <b>PRE</b>  | 4.22                     | 4.23                   |                |
|                              | <b>MB</b>   | <b>1.01</b>              | <b>1.02</b>            | $\leq \pm 0.5$ |
|                              | <b>GE</b>   | 1.60                     | 1.61                   | $\leq 2.0$     |
|                              | <b>RMSE</b> | <b>2.09</b>              | <b>2.10</b>            | $\leq 2.0$     |
| <b>WD (°)</b>                | <b>OBS</b>  | 134.3                    | 134.3                  |                |
|                              | <b>PRE</b>  | 113.6                    | 113.7                  |                |
|                              | <b>MB</b>   | -7.39                    | -7.34                  | $\leq \pm 10$  |
|                              | <b>GE</b>   | <b>37.49</b>             | <b>37.42</b>           | $\leq 30$      |
|                              | <b>RMSE</b> | 53.78                    | 53.64                  |                |
| <b>RH (%)</b>                | <b>OBS</b>  | 66.7                     | 66.7                   |                |
|                              | <b>PRE</b>  | 57.9                     | 57.8                   |                |
|                              | <b>MB</b>   | -8.83                    | -8.92                  |                |
|                              | <b>GE</b>   | 13.82                    | 13.85                  |                |
|                              | <b>RMSE</b> | 18.37                    | 18.40                  |                |

**Table S8.** Model performance on PM<sub>2.5</sub> and PM<sub>10</sub> in 2022 October. (MNB is mean normalized bias; MNE is mean normalized error; MFB is mean fractional bias; MFE is mean fractional error). The performance criteria for PM are suggested by this study (Boylan and Russell, 2006).

|                                                       |             | CASE_unexposed (12 km) | CASE_exposed (12 km) | Criteria |
|-------------------------------------------------------|-------------|------------------------|----------------------|----------|
| <b>PM<sub>2.5</sub></b><br><b>(µg m<sup>-3</sup>)</b> | <b>OBS</b>  | 32.33                  | 32.33                |          |
|                                                       | <b>PRE</b>  | 42.35                  | 42.08                |          |
|                                                       | <b>MNB</b>  | 0.60                   | 0.60                 |          |
|                                                       | <b>MNE</b>  | 1.00                   | 1.00                 |          |
|                                                       | <b>MFB</b>  | 8%                     | 8%                   | ≤ ±60%   |
|                                                       | <b>MFE</b>  | 65%                    | 65%                  | ≤ 75%    |
|                                                       | <b>RMSE</b> | 38.22                  | 37.96                |          |
| <b>PM<sub>10</sub></b><br><b>(µg m<sup>-3</sup>)</b>  | <b>OBS</b>  | 55.28                  | 55.28                |          |
|                                                       | <b>PRE</b>  | 46.82                  | 48.07                |          |
|                                                       | <b>MNB</b>  | 0.03                   | 0.06                 |          |
|                                                       | <b>MNE</b>  | 0.65                   | 0.65                 |          |
|                                                       | <b>MFB</b>  | -27%                   | -24%                 | ≤ ±60%   |
|                                                       | <b>MFE</b>  | 64%                    | 62%                  | ≤ 75%    |
|                                                       | <b>RMSE</b> | 43.65                  | 42.94                |          |

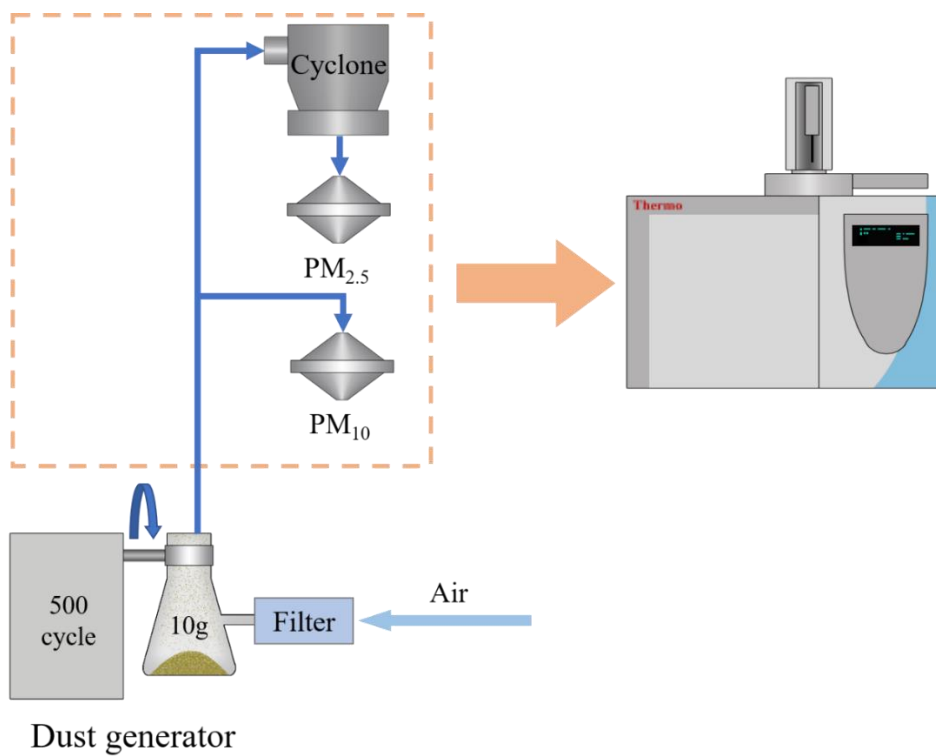

**Figure S1.** Experimental setup. The setup consists of four parts: a dust generation system (Shaker), a dust particle size separation system (PM<sub>2.5</sub> Cyclone), a dust collection system (Filter holder), and a chemical analysis instrument (GC-MS).

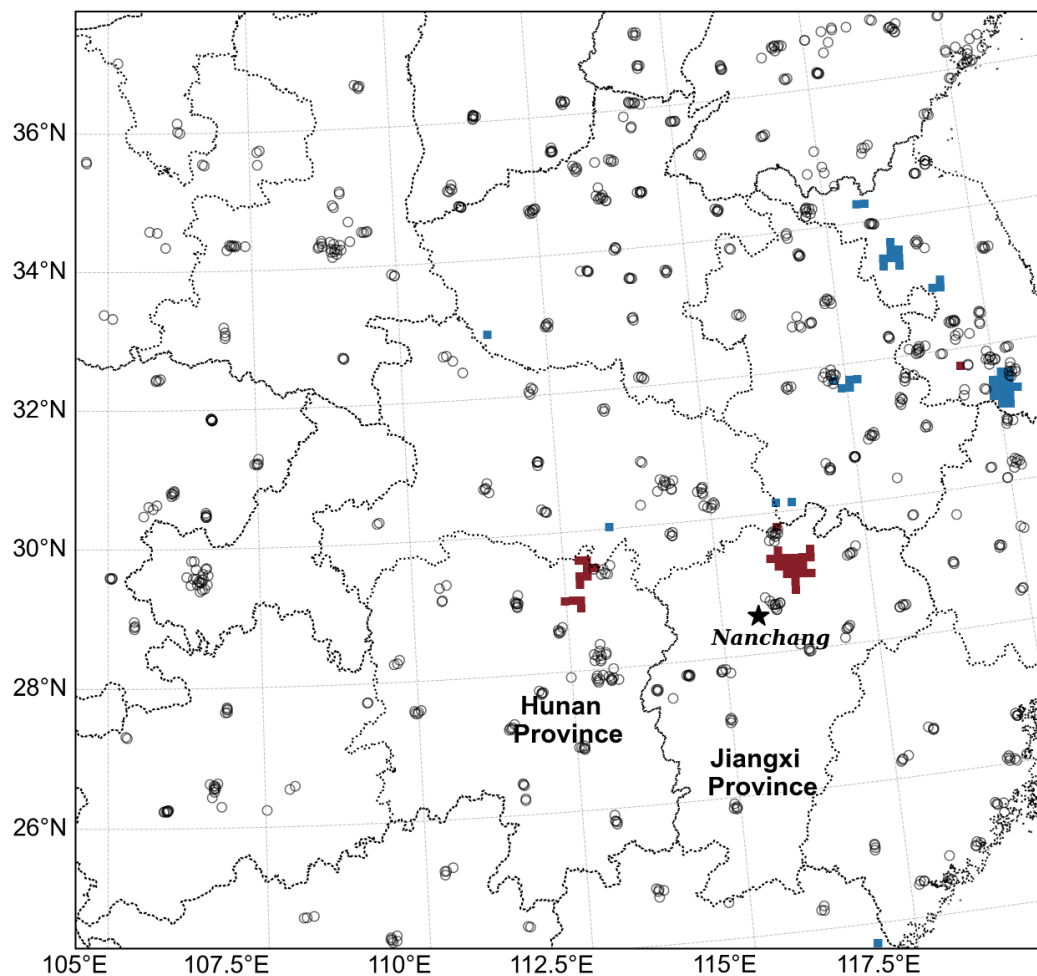

**Figure S2.** Study area setting. Grid cells in the plot of blue are ordinary lakes, and those in red are the exposed lakebeds detected by sentinel-2. Nanchang near Poyang Lake is marked. Hollow circles indicate observation sites.

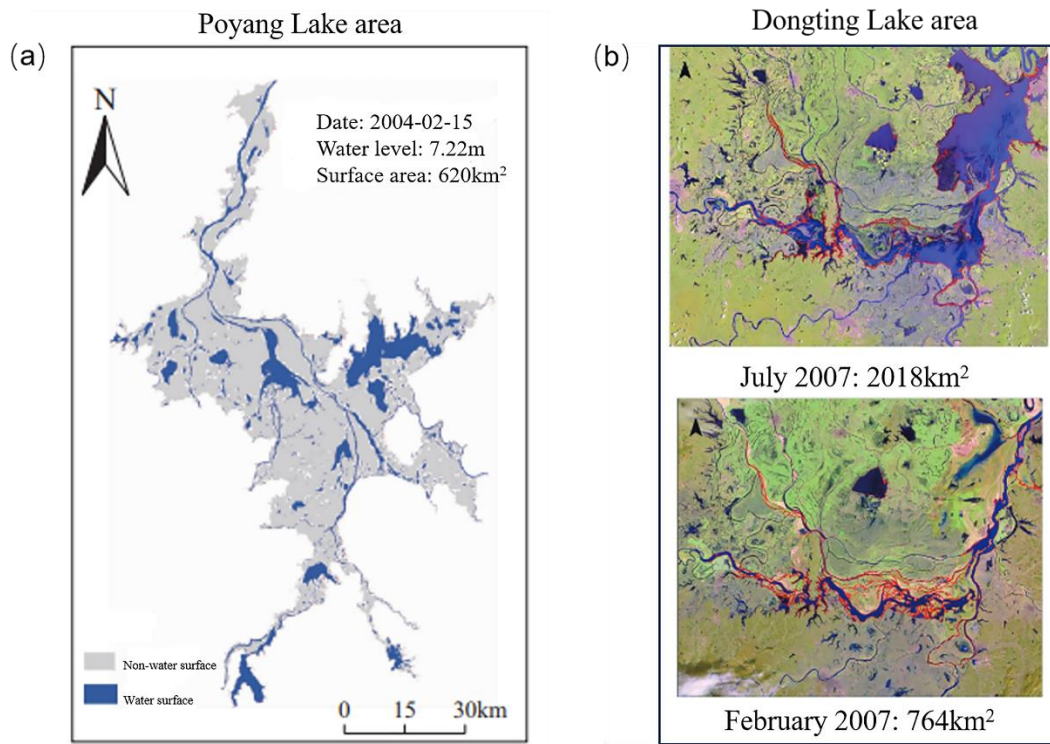

100 **Figure S3.** Lake area of Poyang and Dongting lakes. Water surface area of Poyang Lake (a) and Dongting  
 101 Lake (b) during drought periods. Data were obtained from these studies (Liu et al., 2022; Li et al., 2013).  
 102

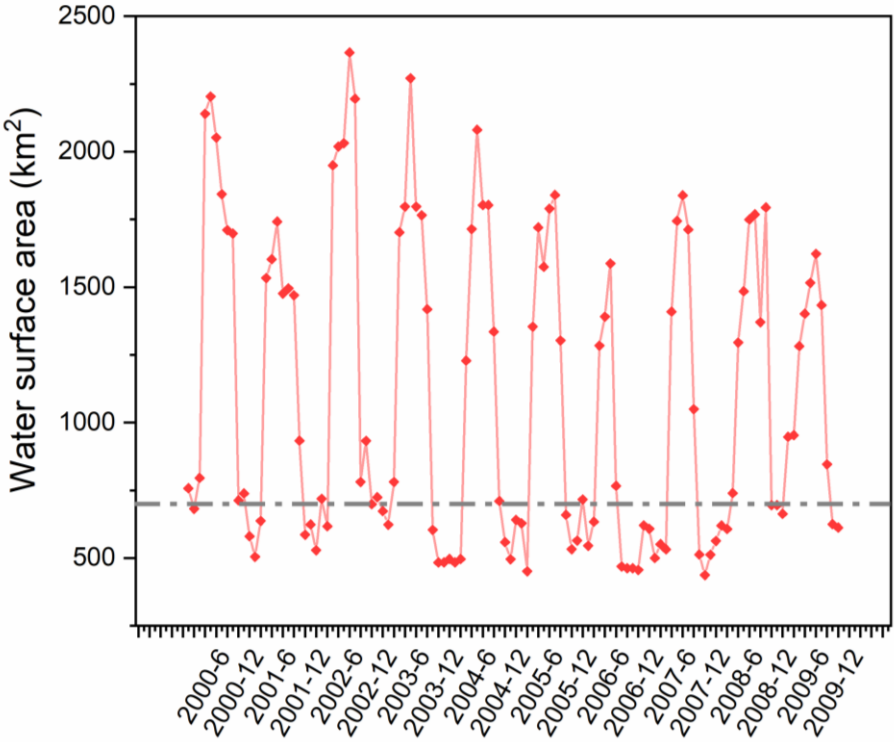

**Figure S4.** Variations of water area in the Dongting Lake. Data observed by Terra/MODIS between March 2000 and December 2009. The gray dotted line at 700 km<sup>2</sup> indicates the drought conditions in Dongting Lake. Between 2000 and 2009, the average duration of drought conditions was 140 days per year (Huang et al., 2012).



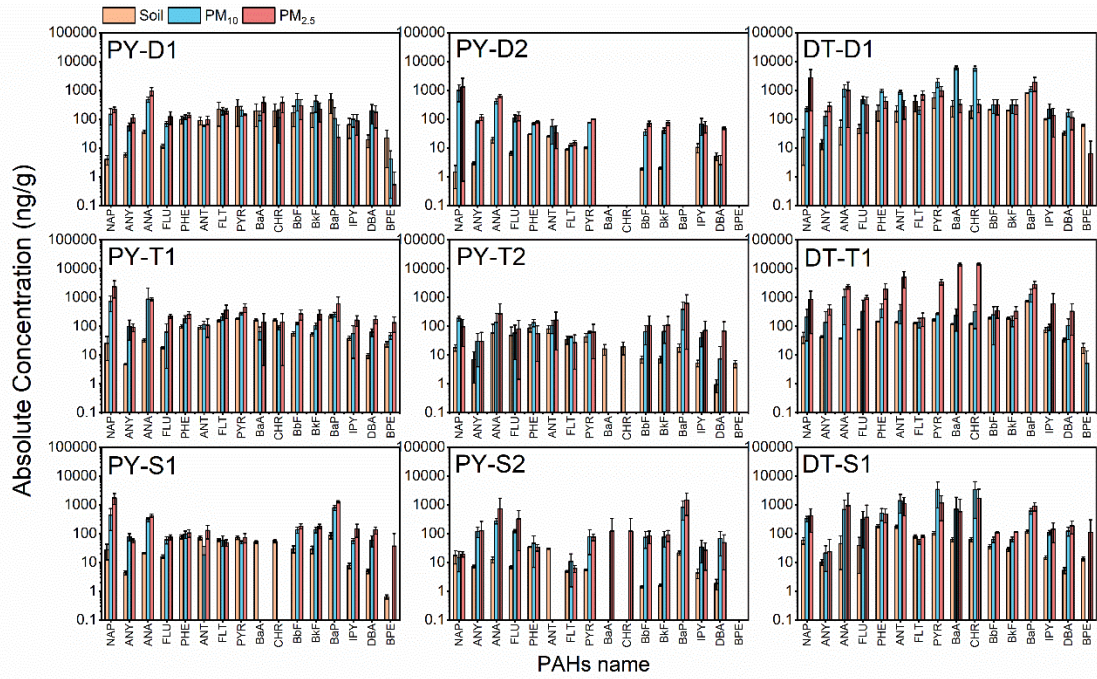

112

113

114

115

116

117

118

119

**Figure S5.** Comparison of the absolute concentrations of heavy metals between natural soil samples and dust aerosols. PY-D1, PY-T1, PY-S1, PY-D2, PY-T2 and PY-S2 were obtained in Poyang Lake, and DT-D1, DT-T1 and DT-S1 were obtained in Dong ting Lake. PY-D1, PY-D2 and DT-D1 are regions typically dry and exposed year-round. PY-T1, PY-T2 and DT-T1 are transitional zones that fluctuate between submerged and dry states. PY-S1, PY-S2 and DT-S1 are areas usually underwater but sometimes exposed due to extreme drought. The whiskers on the bars represent the standard deviations of triplicates.

120

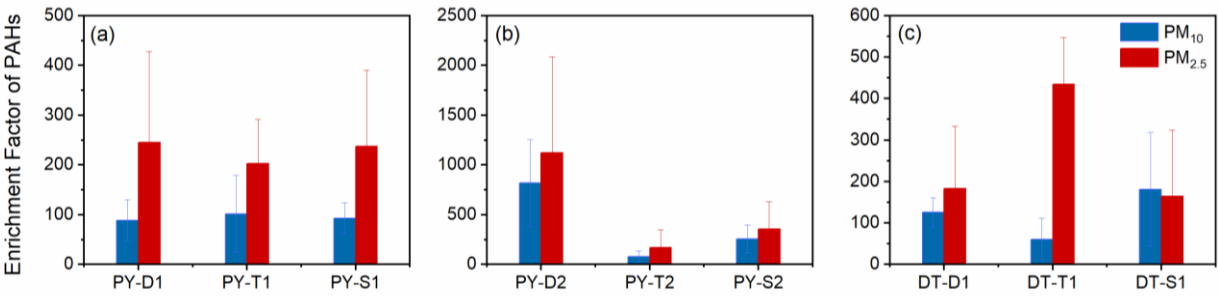

121

122

123

124

125

126

**Figure S6.** Total enrichment factors of PAHs in dust aerosols from soils. PY-D1, PY-D2 and DT-D1 are regions typically dry and exposed year-round. PY-T1, PY-T2 and DT-T1 are transitional zones that fluctuate between submerged and dry states. PY-S1, PY-S1, PY-S2 and DT-S1 are areas usually underwater but sometimes exposed due to extreme drought.

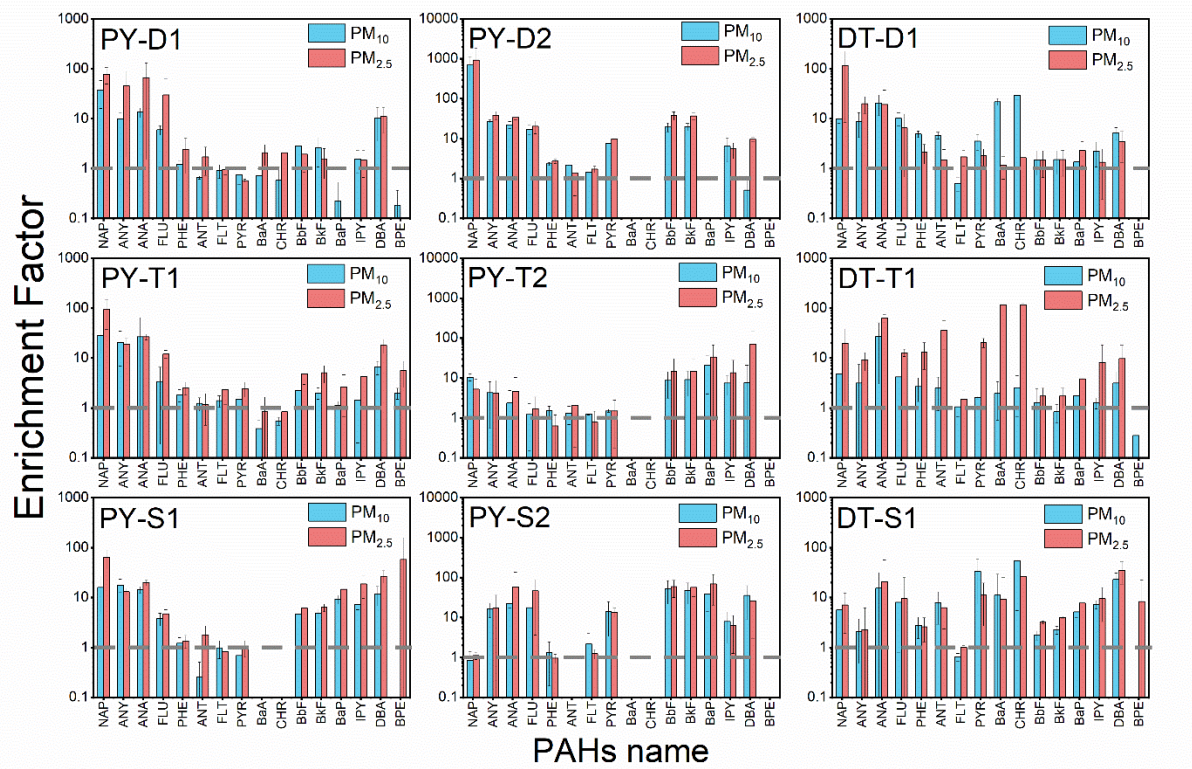

**Figure S7.** Enrichment factors of individual PAH in dust aerosols from soils. Red represents  $PM_{2.5}$  and blue represents  $PM_{10}$ . The grey dotted line represents the EF as 1. PY-D1, PY-T1, PY-S1, PY-D2, PY-T2 and PY-S2 were obtained in Poyang Lake, and DT-D1, DT-T1 and DT-S1 were obtained in Dongting Lake. PY-D1, PY-D2 and DT-D1 are regions typically dry and exposed year-round. PY-T1, PY-T2 and DT-T1 are transitional zones that fluctuate between submerged and dry states. PY-S1, PY-S2, and DT-S1 are areas usually underwater but sometimes exposed due to extreme drought. The whiskers on the bars represent the standard deviations of triplicates.

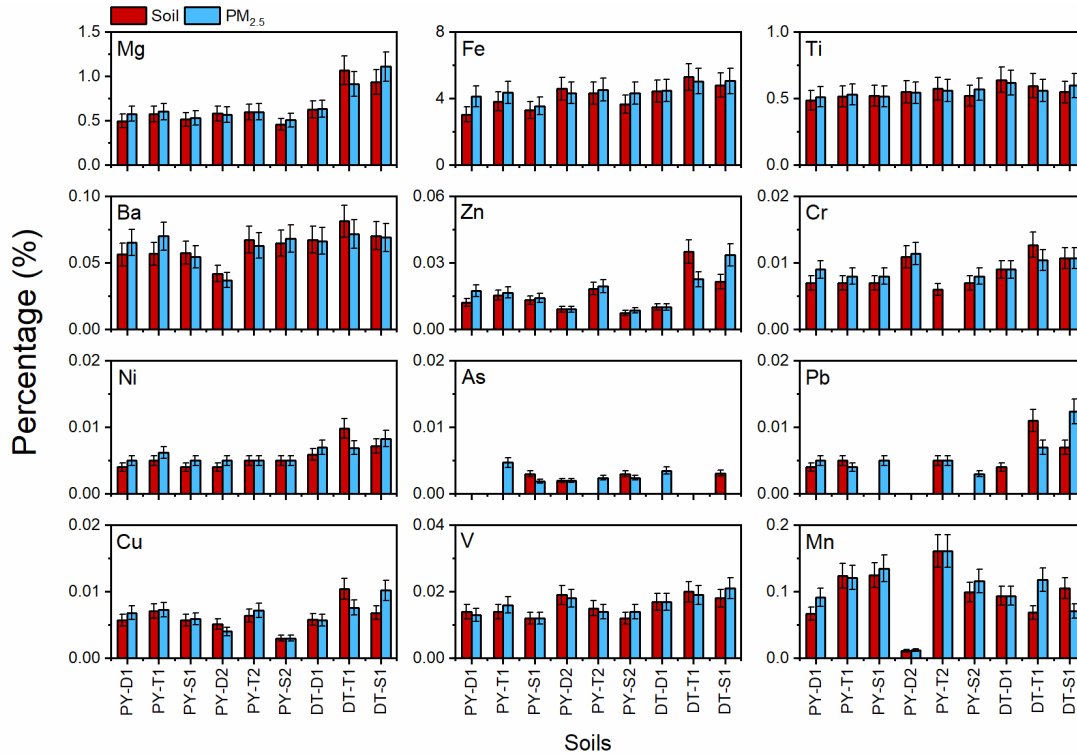

**Figure S8.** Comparison of the absolute concentrations of heavy metals between natural soil samples and dust aerosols. PY-D1, PY-T1, PY-S1, PY-D2, PY-T2 and PY-S2 were obtained in Poyang Lake, and DT-D1, DT-T1 and DT-S1 were obtained in Dong ting Lake. PY-D1, PY-D2 and DT-D1 are regions typically dry and exposed year-round. PY-T1, PY-T2 and DT-T1 are transitional zones that fluctuate between submerged and dry states. PY-S1, PY-S2 and DT-S1 are areas usually underwater but sometimes exposed due to extreme drought. The whiskers on the bars represent the standard deviations of triplicates. The whiskers on the bars represent the standard deviations of triplicates.

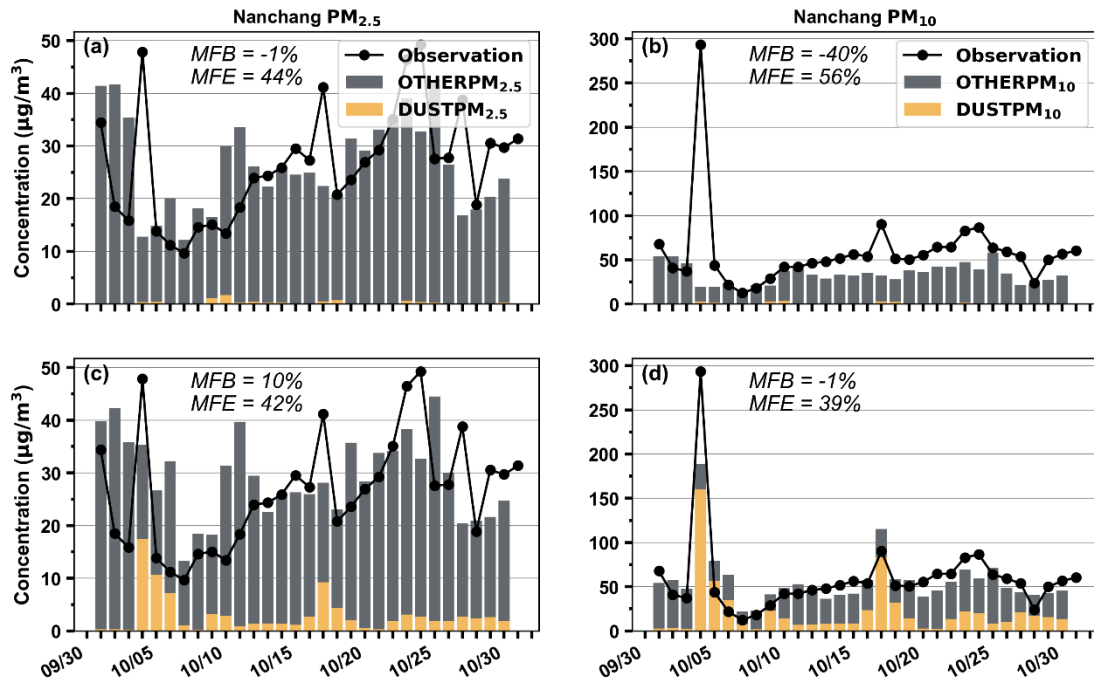

**Figure S9.** Time series of PM concentrations in Nanchang. Upper panels display the CASE\_unexposed (a)  $\text{PM}_{2.5}$  and (b)  $\text{PM}_{10}$  concentration in Nanchang from October 1 to 30 2022. Bottom panels display the CASE\_exposed (c)  $\text{PM}_{2.5}$  and (d)  $\text{PM}_{10}$  concentration in Nanchang from October 1 to 30 2022. (MFB: mean fractional bias; MFE: mean fractional error).

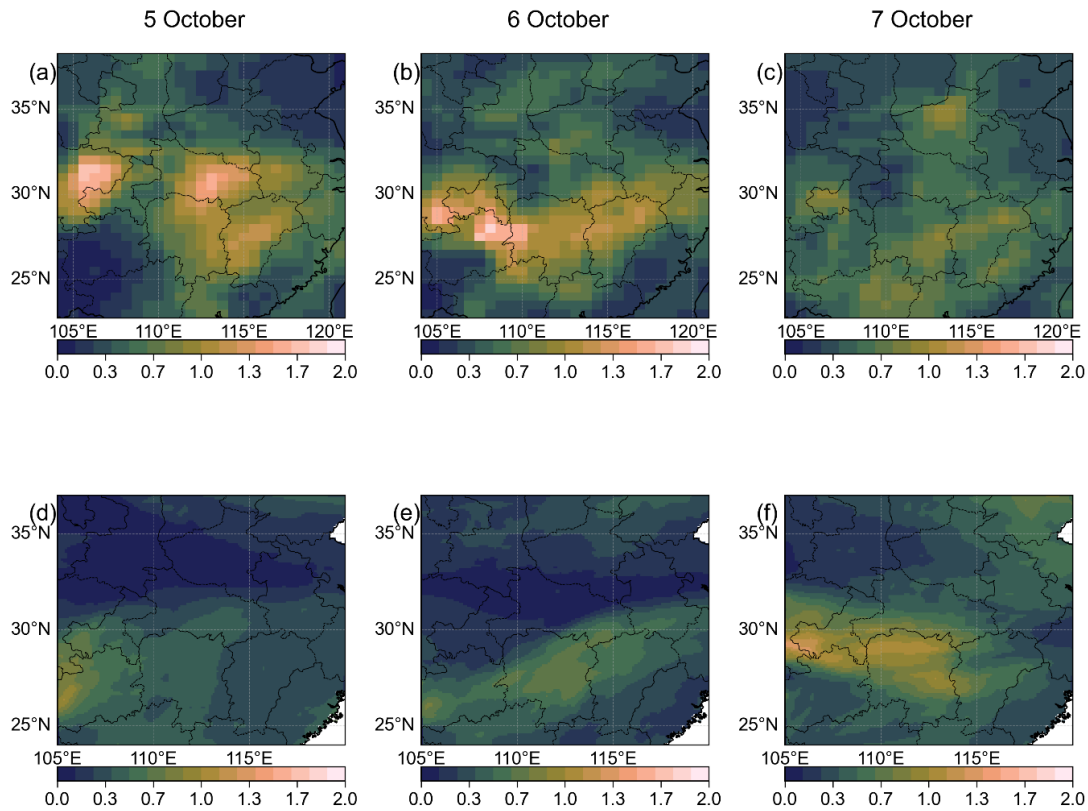

**Figure S10.** Spatial distribution of AOD from MERRA-2 reanalysis (a-c) and CMAQ (CASE\_exposed scenario) (d-f), during 5–7 October 2022.

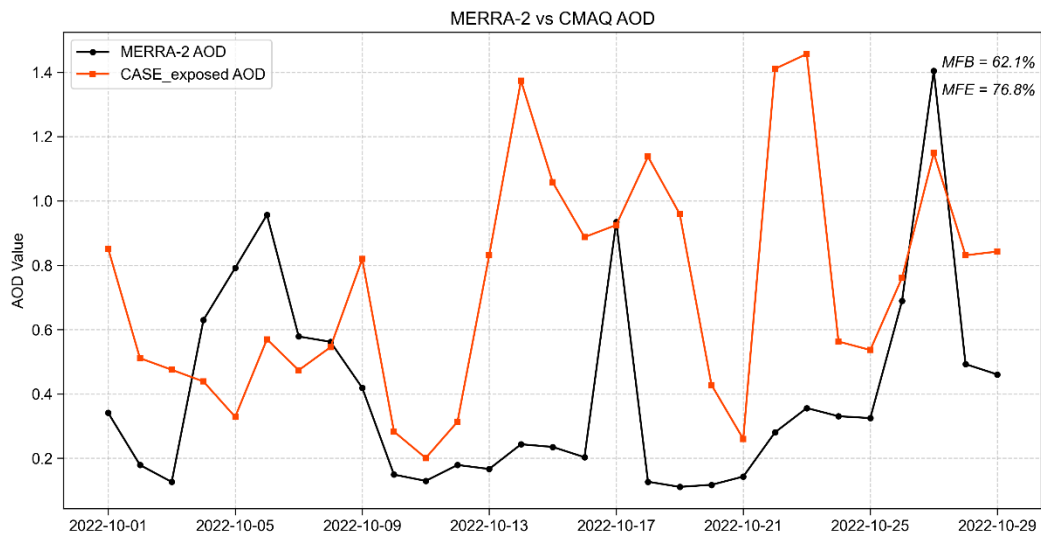

**Figure S11.** Time series of AOD at a grid point near Nanchang (29.3°N, 115.8°E) from MERRA-2 reanalysis and CMAQ (CASE\_exposed scenario).

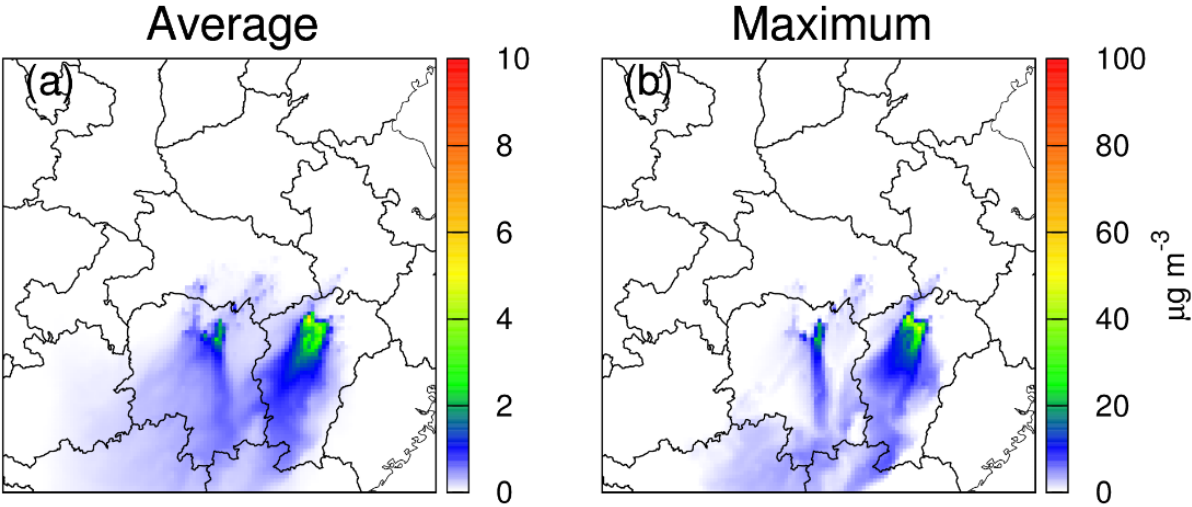

166

167 **Figure S12.** Spatial distribution of predicted monthly average and maximum daily concentrations of lakebed  
168 dust PM<sub>2.5</sub>. Lakebed dust PM<sub>2.5</sub> for (a) monthly average and (b) maximum daily concentrations.

169

170



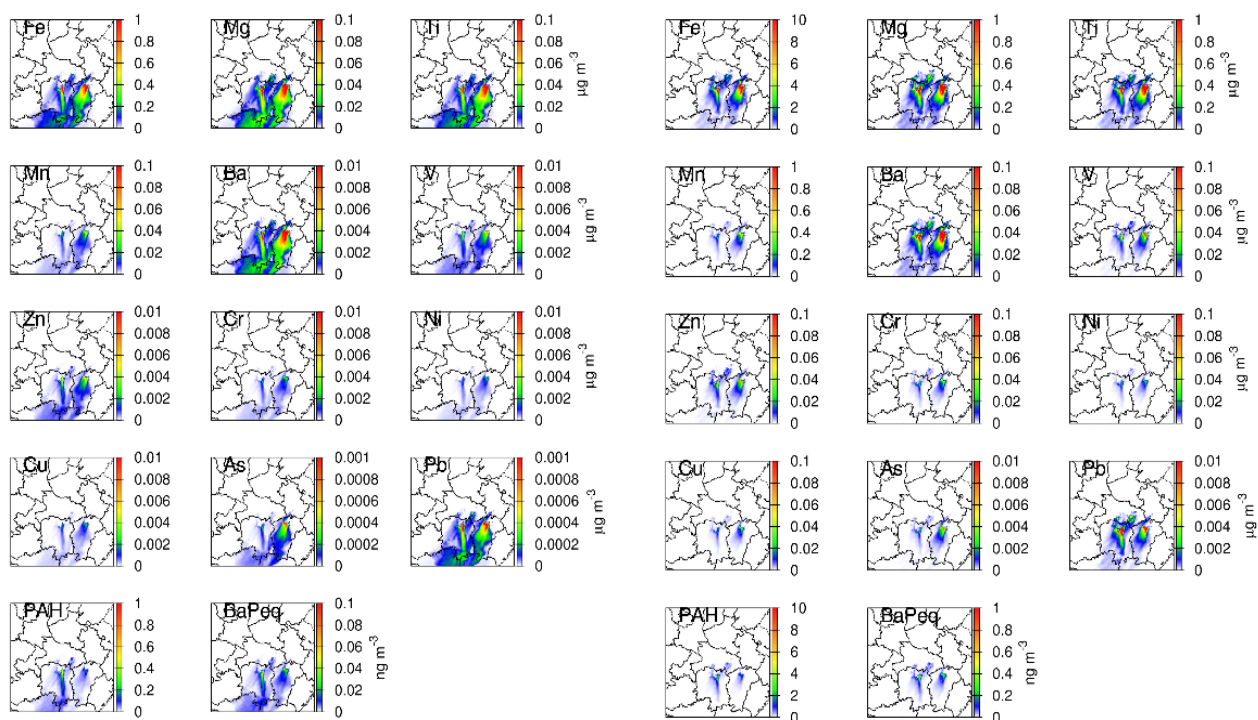

**Figure S13.** Maximum daily HM and PAH concentration of lakebed dust PM. Concentrations for (left)  $PM_{2.5}$  and (right)  $PM_{10}$ .

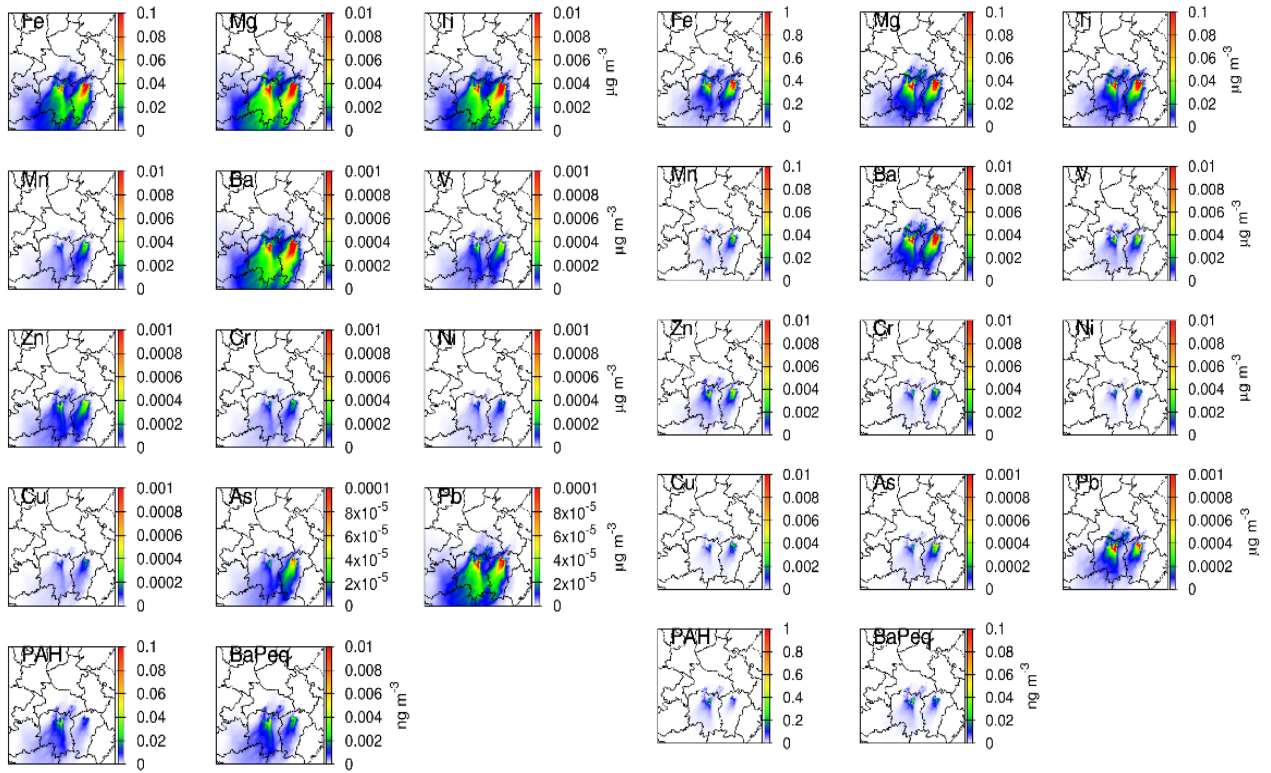

**Figure S14.** Monthly average HM and PAH concentration of lakebed dust PM. Concentrations for (left) PM<sub>2.5</sub> and (right) PM<sub>10</sub>.

## References

- Agency, U. U. S. E. P.: Risk Assessment Guidance for Superfund Volume I: Human Health Evaluation Manual (Part F, Supplemental Guidance for Inhalation Risk Assessment), 13-24, 2009.
- Agency, U. U. S. E. P.: Regional Screening Levels (RSLs) - Resident Ambient Air Table (TR=1E-06, HQ=1), pp. 1-6, 2020.
- Boylan, J. W. and Russell, A. G.: PM and light extinction model performance metrics, goals, and criteria for three-dimensional air quality models, *Atmospheric Environment*, 40, 4946-4959, <https://doi.org/10.1016/j.atmosenv.2005.09.087>, 2006.
- Bureau, B. M.: Environmental Site Assessment Guide (DB11T-656-2009), 2009.
- Delistraty, D.: Toxic equivalency factor approach for risk assessment of polycyclic aromatic hydrocarbons, *Toxicological & Environmental Chemistry*, 64, 81-108, 1997.
- Emery, C., Tai, E., and Yarwood, G.: Enhanced meteorological modeling and performance evaluation for two Texas ozone episodes, Prepared for the Texas natural resource conservation commission, by ENVIRON International Corporation, 2001.
- EPA, U.: Regional Screening Levels (RSLs) - Generic Tables., <https://www.epa.gov/risk/regional-screening-levels-rsls-generic-tables>,
- Huang, R.J., Cheng, R., Jing, M., Yang, L., Li, Y., Chen, Q., Chen, Y., Yan, J., Lin, C., and Wu, Y.: Source-specific health risk analysis on particulate trace elements: coal combustion and traffic emission as major contributors in wintertime Beijing, *Environmental Science & Technology*, 52, 10967-10974, 2018.
- Huang, S., Li, J., and Xu, M.: Water surface variations monitoring and flood hazard analysis in Dongting Lake area using long-term Terra/MODIS data time series, *Natural hazards*, 62, 93-100, 2012.
- Li, P., Feng, Z.-m., Jiang, L.-g., Liu, Y., Hu, J.-w., and Zhu, J.-p.: Natural water surface of Poyang Lake monitoring based on remote sensing and the relationship with water level, *Journal of Natural Resources*, 28, 1556-1568, 2013.
- Liu, J., Chen, Y., Chao, S., Cao, H., Zhang, A., and Yang, Y.: Emission control priority of PM<sub>2.5</sub>-bound heavy metals in different seasons: A comprehensive analysis from health risk perspective, *Science of the total environment*, 644, 20-30, 2018.
- Liu, L., Chen, Z., and Ji, M.: Dongting Lake Area Change Monitoring Based on Sentinel-2 Satellite Data, *Geospatial Information*, 7, 57-60, 2022.
- Monseratt, L.: OEHHA Acute, 8-hour and Chronic Reference Exposure Level (REL) Summary., OEHHA, 2016.
- Nisbet, I. C. and Lagoy, P. K.: Toxic equivalency factors (TEFs) for polycyclic aromatic hydrocarbons (PAHs), *Regulatory toxicology and pharmacology*, 16, 290-300, 1992.
- Organization, W. H.: Air quality guidelines for Europe, World Health Organization. Regional Office for Europe 2000.
- Qi, S., Zhang, X., Jiang, F., and Wang, P.: Research on the causes for hydrological drought trend in Poyang Lake, *Journal of Natural Resources*, 34, 168-178, 2019.
- Ramírez, O., de la Campa, A. M. S., Sánchez-Rodas, D., and de la Rosa, J. D.: Hazardous trace elements in thoracic fraction of airborne particulate matter: Assessment of temporal variations, sources, and health risks in a megacity, *Science of the Total Environment*, 710, 136344, 2020.
- Ren, Y. X., Luo, Q., Zhuo, S. J., Hu, Y. A., Shen, G. F., Cheng, H. F., and Tao, S.: Bioaccessibility and public health risk of heavy Metal(loid)s in the airborne particulate matter of four cities in northern China, *Chemosphere*, 277, 10.1016/j.chemosphere.2021.130312, 2021.
- Wu, S. P., Cai, M. J., Xu, C., Zhang, N., Zhou, J. B., Yan, J. P., Schwab, J. J., and Yuan, C. S.: Chemical

223 nature of PM<sub>2.5</sub> and PM<sub>10</sub> in the coastal urban Xiamen, China: Insights into the impacts of shipping emissions and  
224 health risk, Atmospheric Environment, 227, 117383, 2020.  
225
